# Supplementary material
Source: HighWire-hosted journal article supplement (https://bmjopen.bmj.com/content/13/5/e068424)
Supplement: inline-supplementary-material-1 [file inline-supplementary-material-1.pdf]

Online supplement 1. Table S1. Characteristics of the participating GPs and their practices

|                                                                       | Total N=44    |
|-----------------------------------------------------------------------|---------------|
| <b>Number of patients included per GP (median [IQR])</b>              | 10.5 [3-24.5] |
| <b>Number of participating GPs per centre</b>                         |               |
| MPCC Fontainebleau                                                    | 6 (13.6)      |
| CHC La Courneuve                                                      | 6 (13.6)      |
| MPCC Coulommiers                                                      | 9 (20.5)      |
| MPCC Epinay-sous-Sénart                                               | 5 (11.4)      |
| MPCC Saint-Maur-des-Faussées                                          | 4 (9.1)       |
| MPCC Torcy                                                            | 10 (22.7)     |
| MPCC Nemours                                                          | 4 (9.1)       |
| <b>Age of GP (y) (median [IQR]) (n=42)</b>                            | 34 [32-42]    |
| <b>Sex</b>                                                            |               |
| Female                                                                | 29 (65.9)     |
| Male                                                                  | 15 (34.1)     |
| <b>Type of area in which the practice is located</b>                  |               |
| Rural                                                                 | 0 (0)         |
| Semirural                                                             | 9 (20.5)      |
| Urban                                                                 | 35 (79.5)     |
| <b>State regulation of the GP's fees</b>                              |               |
| Yes                                                                   | 44 (100)      |
| No                                                                    | 0 (0)         |
| <b>Secretarial support</b>                                            | 38 (86.4)     |
| Secretary at the practice                                             | 38 (86.4)     |
| Phone line only                                                       | 17 (38.6)     |
| Appointments made online                                              | 21 (47.7)     |
| <b>Changes in consultation procedures since the COVID-19 epidemic</b> |               |
| Changes                                                               | 38 (86.4)     |
| No changes                                                            | 6 (13.6)      |
| Dedicated COVID-19 centre                                             | 10 (22.7)     |
| Creation of specific COVID-19 consultations                           | 38 (86.4)     |
| Cancellation of non-COVID-19 consultations                            | 13 (29.6)     |
| Creation of separate COVID-19/non-COVID-19 areas                      | 29 (65.9)     |
| <b>Changes to secretarial support since the COVID-19 epidemic</b>     | 15 (34.1)     |
| Closure of the secretary's office                                     | 6 (13.6)      |
| Phone line only                                                       | 18 (40.9)     |
| Appointments made online                                              | 20 (45.5)     |
| <b>Changes to the waiting room since the COVID-19 epidemic</b>        |               |
| No changes                                                            | 0 (0)         |
| Dedicated areas or arrangements in the waiting room                   | 44 (100)      |
| Closure of the waiting room                                           | 0 (0)         |
| <b>Hygiene measures introduced since the COVID-19 epidemic</b>        |               |
| More frequent disinfection of reception areas                         | 44 (100)      |
| Alcohol-based hand sanitizer available for patients                   | 44 (100)      |
| Patients provided with face masks if required                         | 39 (88.6)     |
| <b>Protective measures for caregivers since the COVID-19 epidemic</b> |               |
| Gowns                                                                 | 26 (59.1)     |
| Masks                                                                 | 44 (100)      |
| Overshoes                                                             | 22 (50.0)     |
| Gloves                                                                | 31 (70.5)     |
| Glasses                                                               | 31 (70.5)     |
| Hair nets                                                             | 26 (59.1)     |

Data are quoted as the n (%) for qualitative variables and the median [IQR] for quantitative variables

GP, general practitioner; MPCC : multiprofessional primary care centre; CHS : community health centre
