# Supplementary material
Source: HighWire-hosted journal article supplement (https://bmjopen.bmj.com/content/13/5/e068424)
Supplement: inline-supplementary-material-2 [file inline-supplementary-material-2.pdf]

## Appendix 1. Characteristics of the study population and univariate comparison of the three patient groups (N=516)

|                                                                                              | Total N=516 | No COVID n=180<br>(34.9%) | Confirmed<br>COVID n=166<br>(32.2%) | Uncertain COVID<br>n=170 (32.9%) | P <sup>a</sup> | Confirmed<br>COVID vs no-<br>COVID OR<br>[95% CI] | P <sup>b</sup> | Confirmed<br>COVID vs<br>uncertain COVID<br>OR [95% CI] | P <sup>b</sup> |
|----------------------------------------------------------------------------------------------|-------------|---------------------------|-------------------------------------|----------------------------------|----------------|---------------------------------------------------|----------------|---------------------------------------------------------|----------------|
| Age (years) (median, IQR)                                                                    | 43 [33-56]  | 45 [35-56.5]              | 49 [39-59]                          | 36 [29-49]                       | <0.001         | 1.02 [1.01-1.03]                                  | 0.027          | 1.04 [1.03-1.06]                                        | <0.001         |
| Male sex                                                                                     | 195 (37.8)  | 61 (33.9)                 | 58 (34.9)                           | 76 (44.7)                        | 0.074          | 0.99 [0.63-1.56]                                  | 0.957          | 0.58 [0.36-0.93]                                        | 0.046          |
| Caregivers (n=463/165/149/149)                                                               | 58 (12.5)   | 17 (10.3)                 | 31 (20.8)                           | 10 (6.7)                         | 0.001          | 2.70 [1.39-5.24]                                  | 0.003          | 5.58 [2.50-12.46]                                       | <0.001         |
| Contact with confirmed positive case<br>(n=290/96/98/96)                                     |             |                           |                                     |                                  | <0.001         |                                                   | 0.006          |                                                         | <0.001         |
| No                                                                                           | 130 (44.8)  | 48 (50.0)                 | 30 (30.6)                           | 52 (54.2)                        |                | 1 (ref)                                           |                | 1 (ref)                                                 |                |
| Yes                                                                                          | 67 (23.1)   | 19 (19.8)                 | 36 (36.7)                           | 12 (12.5)                        |                | 3.48 [1.62-7.51]                                  |                | 8.77 [3.59-21.46]                                       |                |
| Uncertain                                                                                    | 93 (32.1)   | 29 (30.2)                 | 32 (32.7)                           | 32 (33.3)                        |                | 1.95 [0.95-4.01]                                  |                | 2.59 [1.22-5.51]                                        |                |
| Smoking (n=159/62/52/45)                                                                     | 64 (40.3)   | 28 (45.2)                 | 16 (30.8)                           | 20 (44.4)                        | 0.235          |                                                   |                |                                                         |                |
| At least one comorbidity (n=509/178/164/167)                                                 | 207 (40.7)  | 85 (47.8)                 | 77 (47.0)                           | 45 (27.0)                        | <0.001         | 0.84 [0.52-1.31]                                  | 0.416          | 1.67 [1.01-2.79]                                        | 0.092          |
| Dyslipidaemia (n=509/178/164/167)                                                            | 16 (3.1)    | 8 (4.5)                   | 7 (4.3)                             | 1 (0.6)                          | 0.071          | 0.73 [0.24-2.18]                                  | 0.570          | 3.11 [0.36-27.18]                                       | 0.57           |
| Obesity (n=173/59/59/55)                                                                     | 67 (38.7)   | 25 (42.4)                 | 23 (39.0)                           | 19 (34.6)                        | 0.692          |                                                   |                |                                                         |                |
| Hypertension (n=509/178/164/167)                                                             | 70 (13.8)   | 25 (14.0)                 | 29 (17.7)                           | 16 (9.6)                         | 0.100          | 1.05 [0.54-2.03]                                  | 0.882          | 0.88 [0.42-1.88]                                        | 0.882          |
| Diabetes (n=509/178/164/167)                                                                 | 31 (6.1)    | 18 (10.1)                 | 7 (4.3)                             | 6 (3.6)                          | 0.020          | 0.28 [0.11-0.73]                                  | 0.018          | 0.62 [0.19-2.00]                                        | 0.423          |
| Cardiovascular disease (n=509/178/164/167)                                                   | 33 (6.5)    | 9 (5.1)                   | 16 (9.8)                            | 8 (4.8)                          | 0.117          | 1.81 [0.73-4.45]                                  | 0.398          | 0.94 [0.36-2.48]                                        | 0.903          |
| Asthma (n=509/178/164/167)                                                                   | 52 (10.2)   | 19 (10.7)                 | 15 (9.2)                            | 18 (10.8)                        | 0.859          |                                                   |                |                                                         |                |
| COPD (n=509/178/164/167)                                                                     | 9 (1.8)     | 6 (3.4)                   | 0 (0)                               | 3 (1.8)                          |                |                                                   |                |                                                         |                |
| Venous thromboembolism (n=509/178/164/167)                                                   | 7 (1.4)     | 4 (2.3)                   | 1 (0.6)                             | 2 (1.2)                          |                |                                                   |                |                                                         |                |
| Inflammatory rheumatic disease<br>(n=509/178/164/167)                                        | 9 (1.8)     | 4 (2.3)                   | 2 (1.2)                             | 3 (1.8)                          |                |                                                   |                |                                                         |                |
| Cancers (n=509/178/164/167)                                                                  | 13 (2.6)    | 8 (4.5)                   | 4 (2.4)                             | 1 (0.6)                          | 0.059          | 0.48 [0.14-1.69]                                  | 0.407          | 2.61 [0.27-25.37]                                       | 0.407          |
| Autoimmune diseases (MS, UC, Crohn's, SLE,<br>sarcoidosis, Basedow etc.) (n=509/178/164/167) | 15 (3.0)    | 10 (5.6)                  | 4 (2.4)                             | 1 (0.6)                          | 0.015          | 0.33 [0.10-1.13]                                  | 0.154          | 3.03 [0.32-28.38]                                       | 0.332          |
| Age > 70 and/or presence of at least one<br>comorbidity (n=509/178/164/167)                  | 210 (41.2)  | 85 (47.8)                 | 78 (47.6)                           | 47 (28.1)                        | <0.001         | 1.03 [0.67-1.59]                                  | 0.899          | 2.33 [1.45-3.74]                                        | <0.001         |
| Mode of consultation (n=515/179/166/170)                                                     |             |                           |                                     |                                  | 0.526          |                                                   |                |                                                         |                |
| Face-to-face                                                                                 | 345 (67.0)  | 125 (69.8)                | 114 (68.7)                          | 106 (62.4)                       |                |                                                   |                |                                                         |                |
| Teleconsultation                                                                             | 157 (30.5)  | 50 (27.9)                 | 48 (28.9)                           | 59 (34.7)                        |                |                                                   |                |                                                         |                |
| Phone                                                                                        | 10 (1.9)    | 4 (2.3)                   | 2 (1.2)                             | 4 (2.3)                          |                |                                                   |                |                                                         |                |
| Home visit                                                                                   | 3 (0.6)     | 0 (0)                     | 2 (1.2)                             | 1 (0.6)                          |                |                                                   |                |                                                         |                |
| <b>Symptoms at the initial consultation</b>                                                  |             |                           |                                     |                                  |                |                                                   |                |                                                         |                |
| Fever or feeling feverish (n=469/158/151/160)                                                | 200 (42.6)  | 68 (43.0)                 | 81 (53.6)                           | 51 (31.9)                        | 0.001          | 1.58 [0.99-2.53]                                  | 0.058          | 2.15 [1.31-3.52]                                        | 0.004          |
| Asthenia (n=184/74/61/49)                                                                    | 145 (78.8)  | 56 (75.7)                 | 50 (82.0)                           | 39 (79.6)                        | 0.665          |                                                   |                |                                                         |                |
| Muscle ache (n=370/117/123/130)                                                              | 219 (59.2)  | 67 (57.3)                 | 85 (69.1)                           | 67 (51.5)                        | 0.015          | 1.63 [0.95-2.80]                                  | 0.074          | 1.91 [1.11-3.29]                                        | 0.04           |
| Headache (n=358/121/108/129)                                                                 | 216 (60.3)  | 76 (62.8)                 | 59 (54.6)                           | 81 (62.8)                        | 0.349          |                                                   |                |                                                         |                |

|                                                                 |            |            |            |            |        |                   |        |                   |        |
|-----------------------------------------------------------------|------------|------------|------------|------------|--------|-------------------|--------|-------------------|--------|
| <b>Rhinorrhoea (n=366/126/109/131)</b>                          | 194 (53.0) | 75 (59.5)  | 56 (51.4)  | 63 (48.1)  | 0.171  |                   |        |                   |        |
| <b>Cough (n=471/163/149/159)</b>                                | 366 (77.7) | 127 (77.9) | 119 (79.9) | 120 (75.5) | 0.649  |                   |        |                   |        |
| <b>Expectorations (n=265/80/80/105)</b>                         | 61 (23.0)  | 17 (21.3)  | 18 (22.5)  | 26 (24.8)  | 0.846  |                   |        |                   |        |
| <b>Chest pain (n=325/107/103/115)</b>                           | 80 (24.6)  | 39 (36.5)  | 19 (18.5)  | 22 (19.1)  | 0.002  | 0.40 [0.21-0.77]  | 0.012  | 0.97 [0.48-1.98]  | 0.94   |
| <b>Dyspnoea at rest and/or on exertion (n=370/131/116/123)</b>  | 128 (34.6) | 56 (42.8)  | 35 (30.2)  | 37 (30.1)  | 0.051  | 0.56 [0.32-0.96]  | 0.07   | 1.09 [0.61-1.96]  | 0.77   |
| <b>Sore throat (n=351/122/102/127)</b>                          | 177 (50.4) | 73 (59.8)  | 44 (43.1)  | 60 (47.2)  | 0.030  | 0.50 [0.29-0.88]  | 0.032  | 0.91 [0.53-1.58]  | 0.746  |
| <b>Anosmia (n=317/109/100/108)</b>                              | 74 (23.3)  | 11 (10.1)  | 42 (42.0)  | 21 (19.4)  | <0.001 | 7.11 [3.30-15.29] | <0.001 | 3.74 [1.91-7.31]  | <0.001 |
| <b>Ageusia (n=282/89/94/99)</b>                                 | 75 (26.6)  | 13 (14.6)  | 42 (44.7)  | 20 (20.2)  | <0.001 | 4.79 [2.31-9.93]  | <0.001 | 3.38 [1.73-6.59]  | <0.001 |
| <b>Nausea and/or vomiting (n=343/120/100/123)</b>               | 50 (14.6)  | 19 (15.8)  | 15 (15.0)  | 16 (13.0)  | 0.815  |                   |        |                   |        |
| <b>Diarrhoea (n=360/127/110/123)</b>                            | 84 (23.3)  | 33 (26.0)  | 32 (29.1)  | 19 (15.5)  | 0.033  | 1.21 [0.68-2.17]  | 0.513  | 2.58 [1.31-5.07]  | 0.012  |
| <b>Abdominal pain (n=143/57/44/42)</b>                          | 19 (13.3)  | 7 (12.3)   | 7 (15.9)   | 5 (11.9)   | 0.826  |                   |        |                   |        |
| <b>Number of symptoms (tertile; n=511/179/163/169)</b>          |            |            |            |            | 0.528  |                   |        |                   |        |
| ≤3                                                              | 181 (35.4) | 68 (38.0)  | 49 (30.1)  | 64 (37.9)  |        |                   |        |                   |        |
| 4-5                                                             | 184 (36.0) | 62 (34.6)  | 62 (38.0)  | 60 (35.5)  |        |                   |        |                   |        |
| >5                                                              | 146 (28.6) | 49 (27.4)  | 52 (31.9)  | 45 (26.6)  |        |                   |        |                   |        |
| <b>Number of systemic symptoms (tertile; n=511/179/163/169)</b> |            |            |            |            | 0.020  |                   |        |                   |        |
| ≤1                                                              | 216 (42.3) | 82 (45.8)  | 56 (34.3)  | 78 (46.2)  |        | 1 (ref)           | 0.100  | 1 (ref)           | 0.072  |
| 2                                                               | 142 (27.8) | 40 (22.4)  | 49 (30.1)  | 53 (31.4)  |        | 1.80 [1.04-3.11]  |        | 1.19 [0.69-2.05]  |        |
| >2                                                              | 153 (29.9) | 57 (31.8)  | 58 (35.6)  | 38 (22.5)  |        | 1.42 [0.85-2.37]  |        | 1.83 [1.04-3.22]  |        |
| <b>Number of ENT symptoms (tertile; n=511/179/163/169)</b>      |            |            |            |            | 0.277  |                   |        |                   |        |
| 0                                                               | 182 (35.6) | 62 (34.6)  | 55 (33.7)  | 65 (38.5)  |        |                   |        |                   |        |
| 1                                                               | 188 (36.8) | 75 (41.9)  | 55 (33.7)  | 58 (34.3)  |        |                   |        |                   |        |
| >1                                                              | 141 (27.6) | 42 (23.5)  | 53 (32.6)  | 46 (27.2)  |        |                   |        |                   |        |
| <b>Clinical examination</b>                                     |            |            |            |            |        |                   |        |                   |        |
| <b>Temperature&gt;38°C</b>                                      |            |            |            |            | 0.012  |                   | 0.343  |                   | <0.001 |
| No                                                              | 325 (63.0) | 110 (61.1) | 92 (55.4)  | 123 (72.4) |        | 1 (ref)           |        | 1 (ref)           |        |
| Yes                                                             | 39 (7.6)   | 15 (8.3)   | 18 (10.8)  | 6 (3.5)    |        | 1.52 [0.71-3.24]  |        | 4.09 [1.48-11.30] |        |
| Not reported or missing                                         | 152 (29.4) | 55 (30.6)  | 56 (33.7)  | 41 (24.1)  |        | 1.35 [0.83-2.20]  |        | 2.30 [1.35-3.91]  |        |
| <b>Respiratory rate (per minute) (n=101/41/38/22)</b>           | 18 [16-20] | 18 [16-20] | 20 [17-20] | 18 [16-20] | 0.387  |                   |        |                   |        |
| <b>SaO2 (%) (n=272/91/96/85)</b>                                | 98 [97-99] | 98 [97-99] | 98 [97-99] | 98 [97-99] | 0.153  |                   |        |                   |        |
| <b>Abnormalities in a lung examination</b>                      |            |            |            |            | 0.585  |                   |        |                   |        |
| No                                                              | 270 (52.3) | 94 (52.2)  | 90 (54.2)  | 86 (50.6)  |        |                   |        |                   |        |
| Yes                                                             | 48 (9.3)   | 20 (11.1)  | 16 (9.7)   | 12 (7.1)   |        |                   |        |                   |        |
| Not reported or missing                                         | 198 (38.4) | 66 (36.7)  | 60 (36.1)  | 72 (42.3)  |        |                   |        |                   |        |

Data are quoted as the n (%) for qualitative variables and the median [IQR] for quantitative variables

a The p-values were obtained from a chi-squared test or Fisher's exact test for qualitative variables and from the Kruskal Wallis test for quantitative variables

b Age-adjusted multilevel multinomial logistic regression; p-values of pair-wise comparisons were corrected by the False discovery rate method

COPD: chronic obstructive pulmonary disease; MS: multiple sclerosis; UC: ulcerative colitis; SLE: systemic lupus erythematosus; ENT: ear nose throat; SaO<sub>2</sub>: arterial oxygen saturation; OR: odds ratio; CI: confidence interval
